# Supplementary material
Source: publisher figshare collection journal article supplement (https://tandf.figshare.com/ndownloader/files/13876685)
Supplement: Supplementary file 1 [file 13876685]

The challenges of using satellite datasets to assess historical land use change and associated greenhouse gas emissions - a case study of three Indonesian provinces

Supplementary material

# Supplementary figures


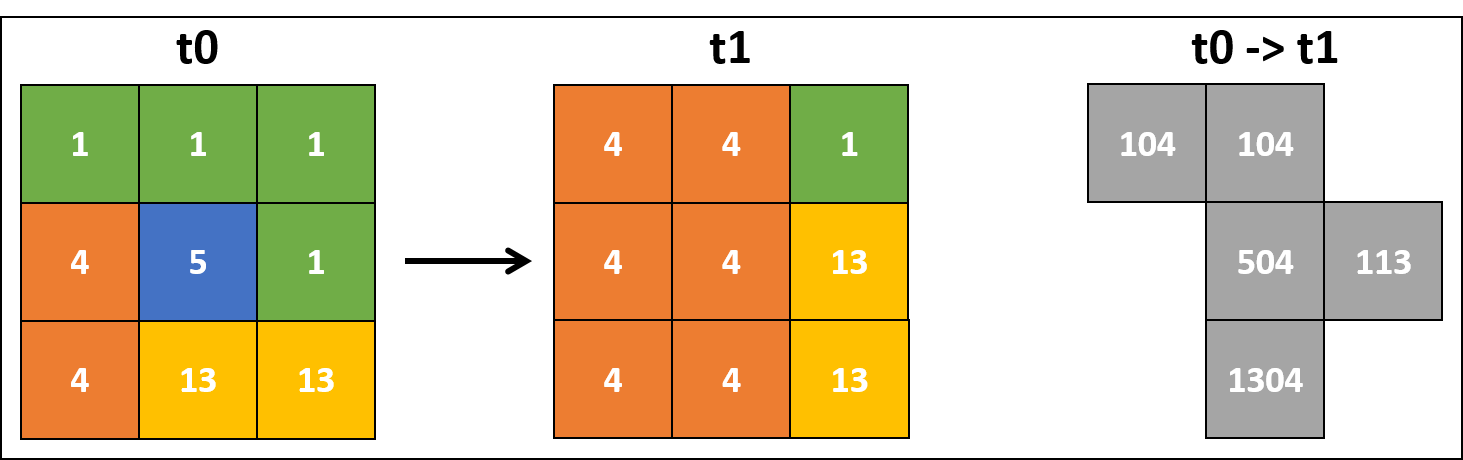


Figure SM1 - Schematic overview of LULC change raster calculations


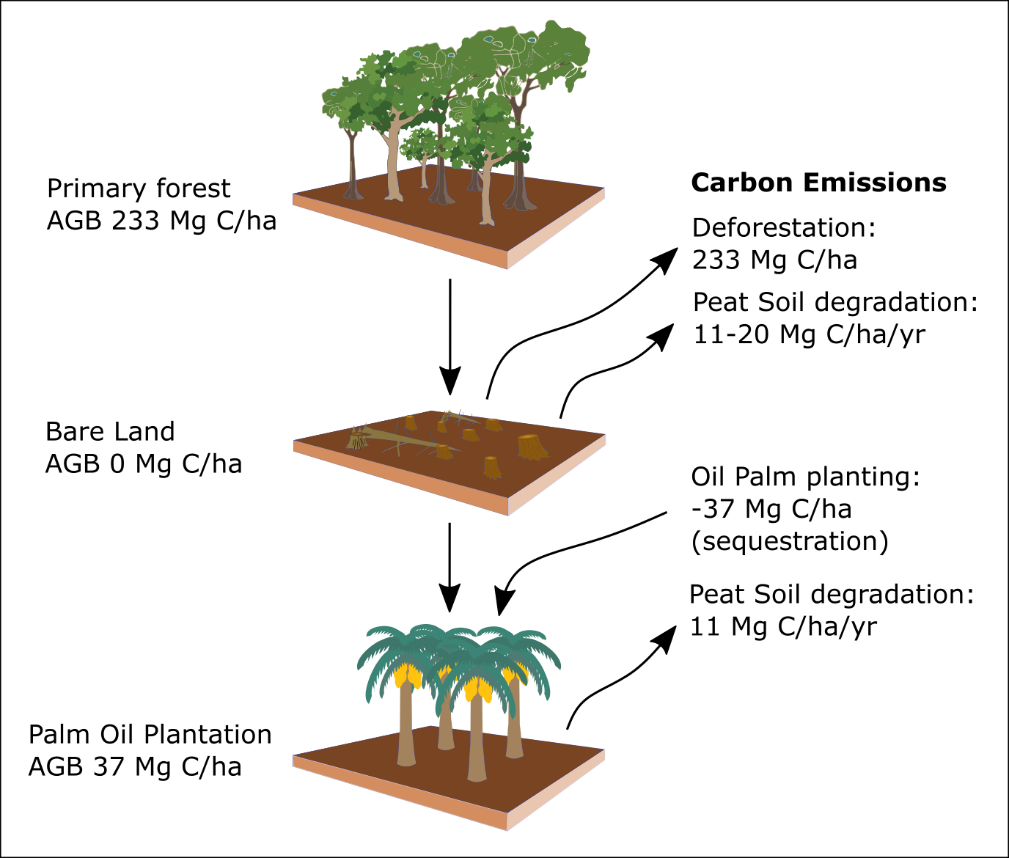


Figure SM2 – Schematic overview of GHG emissions calculation from LULC change.


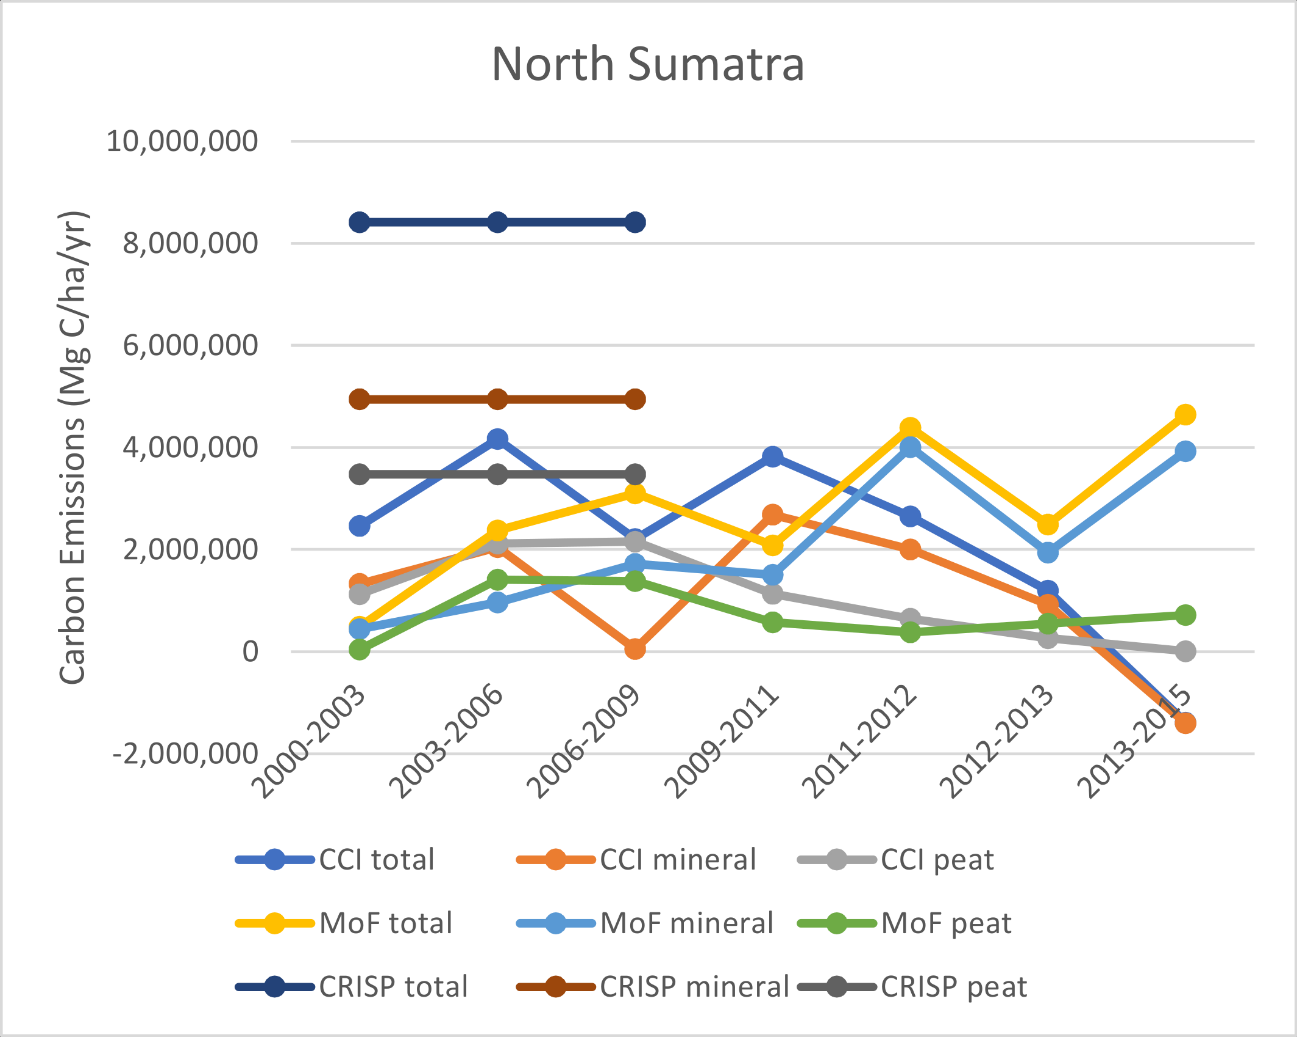


Figure SM3 – GHG emissions estimates from LULC change data between 2000-2015 in North Sumatra


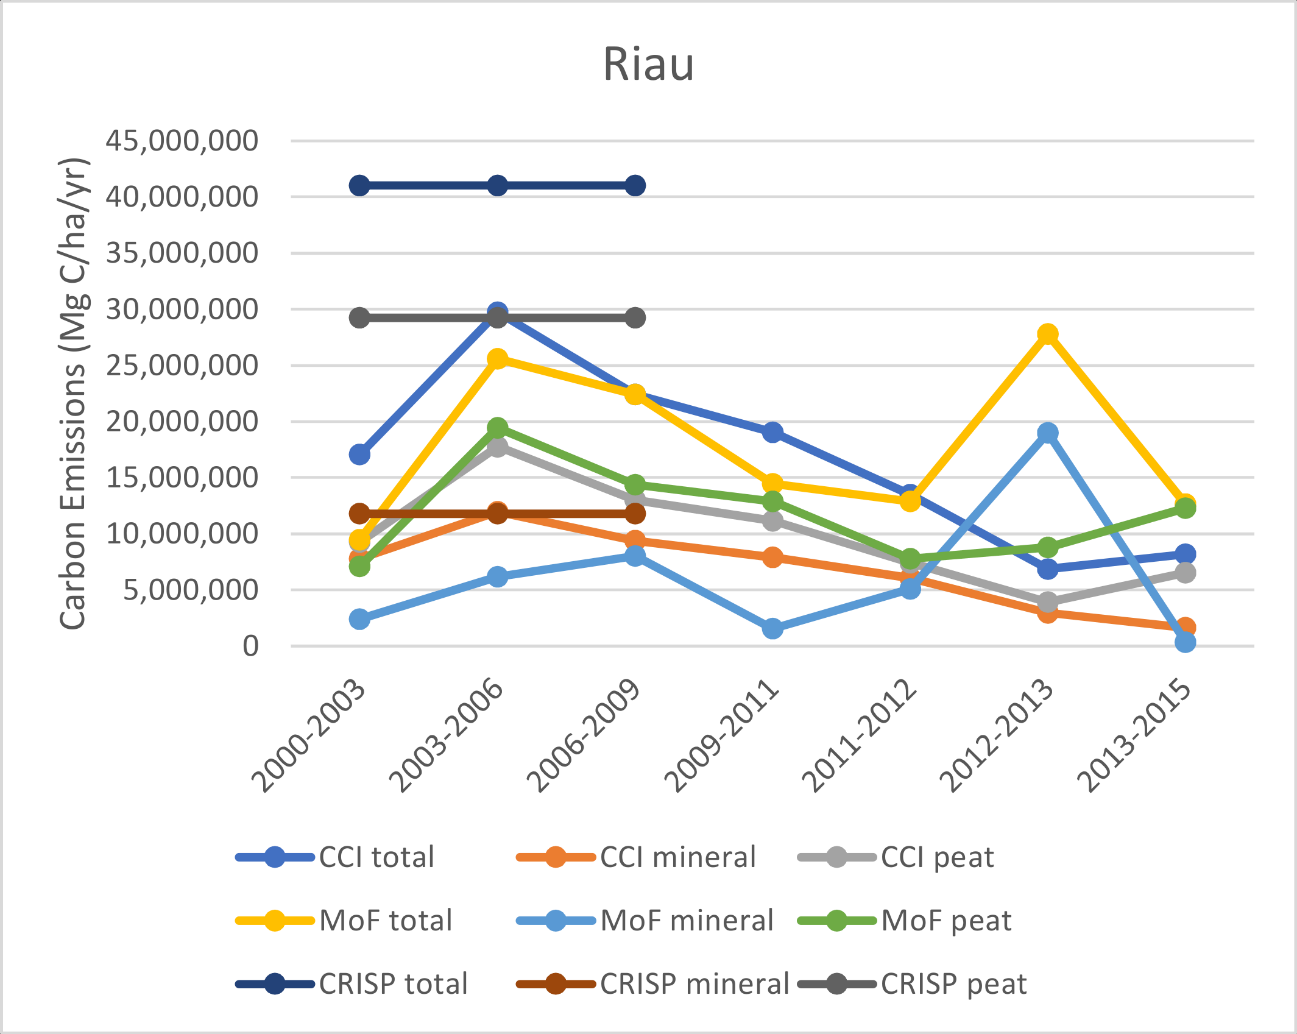


Figure SM4 – GHG emissions estimates from LULC change data between 2000-2015 in Riau


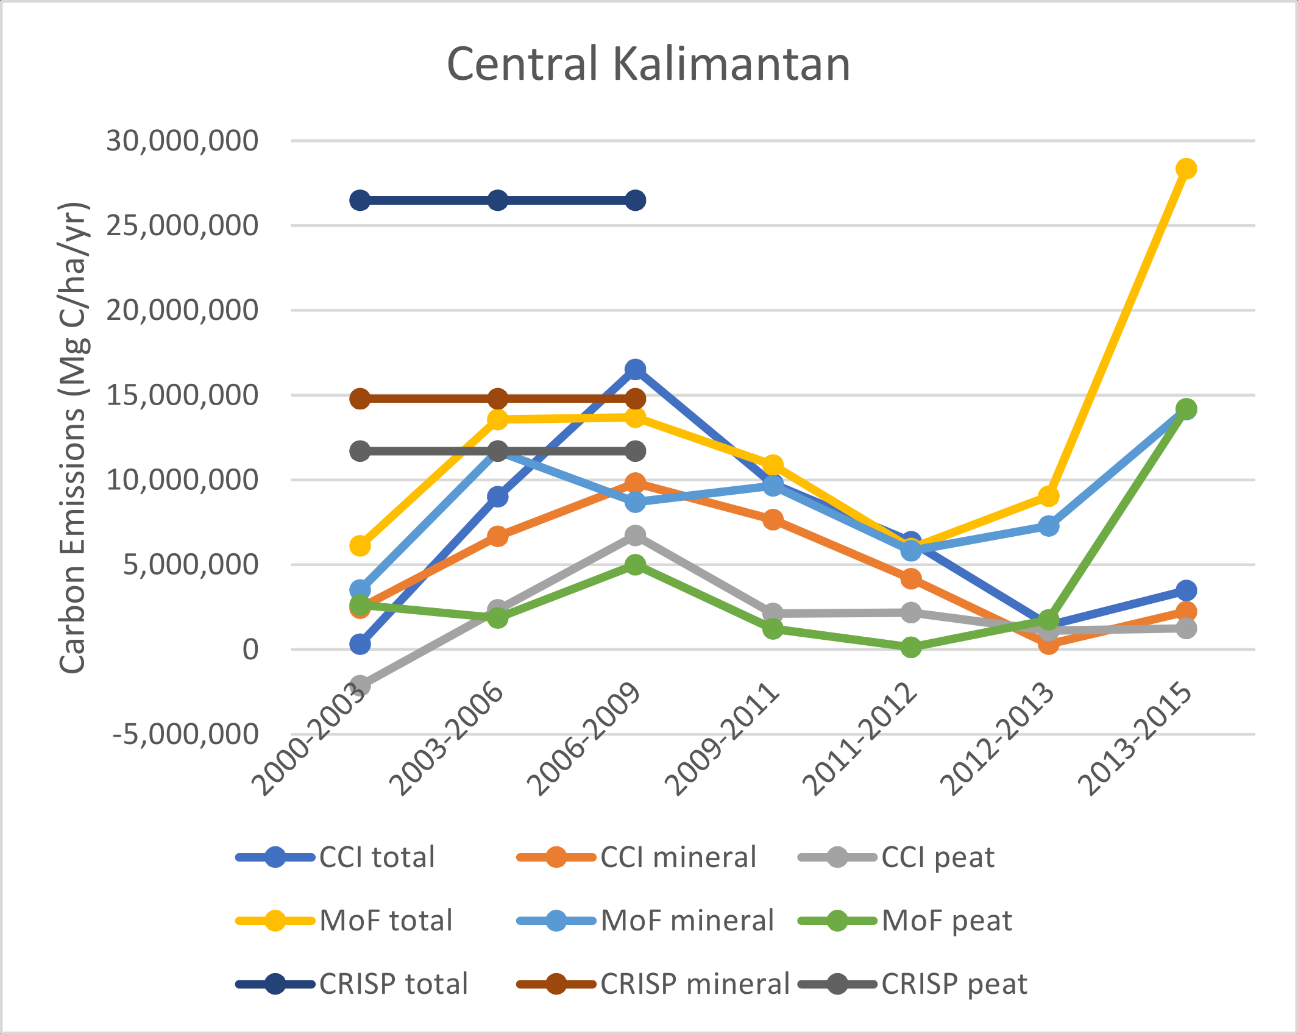


Figure SM5 – GHG emissions estimates from LULC change data between 2000-2015 in Central Kalimantan

# Supplementary tables

Table SM1 –LULC change periods for the LULC datasets. CRISP 2015 data not used for LULC change analysis

| **LULC data update** | | |
| --- | --- | --- |
| **CCI** | **CRISP** | **MoF** |
| 2000 | 2000 | 2000 |
| 2003 |  | 2003 |
| 2006 |  | 2006 |
| 2009 |  | 2009 |
|  | 2010 |  |
| 2011 |  | 2011 |
| 2012 |  | 2012 |
| 2013 |  | 2013 |
| 2015 | *2015* | 2015 |

Table SM2: Carbon stock values for use in calculating aboveground biomass (vegetation) transitions

| **LAND COVER (LC)** | | | | **CARBON STOCK** | |
| --- | --- | --- | --- | --- | --- |
| ***Collective LC class*** | ***CCI LC class*** | ***CRISP LC class*** | ***MoEF CL class*** | ***C stock value***  ***(Mg C ha-1)*** | ***Ref source, notes, comparison with other published average values & ranges*** |
| Primary forest – intact, natural forest with dense canopy | Tree cover, broadleaved, evergreen, closed to open (>15%) | Lowland evergreen forest | Primary dry land forest | 93  121  164  175-200  177  180  195  200  202  225  229  229±62  230  250  250  250  252  254  274±97  300  300-325  390  399 | Harja et al 2011, *Indonesia*  Griscom et al 2009*, Indonesia*  Gibbs & Brown 2007, *tropical Asia*  Brown et al 2003, *the Tropics*  Morel et al 2011, *Malaysia*  Laumonier et al 2010, *Indonesia*  BAPPENAS 2010, *Indonesia*  Toma et al 2005, *Indonesia*  Hoshizaki et al 2004, *Malaysia*  IPCC 2006, *tropical Asia*  Omar 2010, *Malaysia*  Slik et al. 2010, *Borneo*  Rahayu et al 2005, *Indonesia*  Houghton 1999, *the Tropics*  DeFries et al 2002, *the Tropics*  Yamakura et al 1986, *Indonesia*  Prasetyo et al 2000, *Indonesia*  Noordwijk et al 2000, *Indonesia*  Kronseder et al 2012, *Indonesia*  World Agrofor. Centre 2011, *SE Asia*  Murdiyarso & Wasrin 1995, *Indonesia*  Hairiah & Sitompul 2000, *Indonesia*  Proctor et al 1983, *Malaysia* |
|  |  | **Average 233±72** | Agus et al. 2013, 189±42, *SE Asia*  Ziegler et al. 2012, min 40 - max 400, *lowland forests in SE Asia* |
|  | Tree cover, flooded, fresh or brackish water | Peatswamp forest | Primary swamp forest | 90  90±54  113±9  196  200  250 | Harja et al. 2011, *Indonesia*  Murdiyarso et al. 2010, *Indonesia*  Toriyama et al 2014, *Indonesia*  MoF 2008, *Indonesia*  World Agrofor. Cent. 2011, *Indonesia*  Murdiyarso & Wasrin 1995, *Indonesia* |
|  | |  |  | **Average 157±68** | Agus et al. 2013, 162±51, *SE Asia* |
|  | Tree cover, flooded, saline water | Mangrove | Primary mangrove forest | 12-104-143  65  85  86  135  160  170  200 | Murdiyarso et al. 2009, *Indonesia*  Murdiyarso & Wasrin 1995, *Indonesia*  Harja et al. 2011, *Indonesia*  IPCC 2013, *the wet Tropics*  Putz & Chan 1986, *Malaysia*  Donato et al. 2011, *Asia*  Komiyama et al 2008, *Indonesia*  World Agrofor. Cent. 2011, *Indonesia* |
|  |  |  |  | **Average 116±56** | Agus et al. 2013, 148±43, *SE Asia* |
| Secondary forest – disturbed forest with evidence of logging |  |  | Secondary dry land forest | 43-60  55-132  74  87  92±25  93  124-194  134  150-250  170  180  203 | Pinard & Putz 1996, *Malaysia*  Morel et al 2011, *Malaysia*  Harja et al 2011, *Indonesia*  Henson 2005, *Malaysia*  Carlson et al. 2013, *Indonesia*  Palm et al 1999, *the Tropics*  Carlson et al. 2012, *Indonesia*  Omar et al 2010, *Malaysia*  World Agrofor. Cent. 2011, *Indonesia*  MoF 2008, *Indonesia*  IPCC 2006, *tropical Asia*  Rahayu et al. 2006, *Indonesia* |
|  |  |  |  | **Average 128±53** | Agus et al. 2013, 104±59, *SE Asia*  Ziegler et al. 2012, min 30 - max 210, *logged forests in SE Asia* |
|  |  |  | Secondary swamp forest | 33-64  72±43  78  85±24  114±49  120  125-156  155 | Morel et al 2011, *Malaysia*  Carlson et al. 2013, *Indonesia*  Harja et al 2011, *Indonesia*  Hergoualc’h & Verchot 2011, *SE Asia*  Kronseder et al 2012, *Indonesia*  World Agrofor. Cent. 2011, *Indonesia*  Waldes & Page 2001, *Indonesia*  MoF 2008, *Indonesia* |
|  |  |  |  | **Average 102±37** | Agus et al. 2013, 84±42, *SE Asia* |
|  |  |  | Secondary mangrove forest | 77  100  105  120 | Harja et al. 2011, *Indonesia*  World Agrofor. Cent. 2011, *Indonesia*  Ong et al 1982, *Malaysia*  Komiyama et al 2008, *Indonesia* |
|  |  |  |  | **Average 101±15** | Agus et al. 2013, 101±15, *SE Asia* |
| Cropland | Cropland, irrigated or post-flooding | Large scale oil palm plantations | Plantations | *Oil palm plantations* | |
|  |  |  |  | 23  26  30  31  31  35-55  36  36  37  38-42  40  60 | Corley & Tinker 2003, *Malaysia*  Morel et al 2011, *Malaysia*  Germer & Sauerborn 2008, *the tropics*  World Agrofor. Cent. 2011, *Indonesia*  Sitompul & Hairiah 2000, Indonesia  Syahrinudin 2005, Indonesia  Henson 2005, *Malaysia*  Palm et al 2004, *the Tropics*  Dewi et al. 2009, *Indonesia*  Khasanah et al. 2015, *Indonesia*  van Noordwijk et al 2010, *Indonesia*  Rogi 2002, Indonesia |
|  |  |  |  | **Average 37±10** | Agus et al 2013, 36±11ǂ, *SE Asia*  Ziegler et al 2012, min 17- max 69, *SE Asia* |
|  |  |  |  | *Rubber plantations* | |
|  |  |  |  | 31  36  46-89  97 | World Agroforest. Cent. 2011, *Indonesia*  Prasetyo et al 2000, *Indonesia*  Palm et al. 1999, *the Tropics*  Lasco & Puhlin 2004, *SE Asia* |
|  |  |  |  | **Average 60±31** | Agus et al. 2013, 58±28, *SE Asia*  Ziegler et al. 2012, min 25 - max 143, *SE Asia* |
|  |  |  |  | *Timber plantations (monocultures, e.g. Acacia, Eucalyptus)* | |
|  |  |  | HTI (hutan temanan industri) | 21±2  29  35  37  38  60-70 | Hergoualc’h & Verchot 2011, *SE Asia*  Morel et al 2011, *Malaysia*  Matsumura et al 2008, *Malaysia*  Palm et al 1999, *the Tropics*  Nurwahyudi & Tarigan 2001*, Indonesia*  World Agroforest. Cent. 2011, *Indonesia* |
|  |  |  |  | **Average 41±17** | Agus et al. 2013, 44±14, *SE Asia* |
|  |  |  | Rice land | *Rice fields* | |
|  |  |  |  | 2  5  5 | Palm et al 1999, *the Tropics*  Hergoualc’h & Verchot 2011, *SE Asia*  Rahayu et al. 2005, *Indonesia* |
|  |  |  |  | **Average 4±2** | Agus et al. 2013, 2±0, *SE Asia* |
| Agroforestry (mixed tree crops) | Mosaic cropland | Lowland mosaic |  | 38-73  71±131  77 | Rahayu et al 2005, *Indonesia*  Carlson et al. 2013, *Indonesia*  World Agroforest. Cent. 2011, *Indonesia* |
|  |  |  |  | **Average 65±18** | Agus et al. 2013, 54±24, *SE Asia*  Ziegler et al 2012, min 15 - max 100, *SE Asia* |
| Scrub – small trees and woody shrubs, early stage forest regrowth | Shrubland evergreen; sparse vegetation (tree, shrub, herbaceous cover) | Lowland open | Scrubland (on mineral soils) | 24  27  29  30  35  42 | Hashimotio et al 2000, *Indonesia*  World Agroforest. Cent., *Indonesia*  Jepsen 2006, *Malaysia*  Isotomo et al 2006, *Indonesia*  IPCC 2006, *the Tropics*  Halenda 1989, *Malaysia* |
|  |  |  |  | **Average 31±6** | Agus et al. 2013, 30±3, *SE Asia* |
|  |  |  | Swamp scrubland (on peat soils) | 10-25  18  29  30  35 | Hoscilo et al. 2011, *Indonesia*  World Agroforesty Cent. 2001, *Indonesia*  Jepsen 2006, *Malaysia*  Isotomo et al. 2006, *Indonesia*  IPCC 2006, *the Tropics* |
|  |  |  |  | **Average 25±9** | Agus et al. 2013, 28±6, *SE Asia* |
| Settlements | Urban areas | Urban | Housing | 4  10 | World Agroforest. Cent., *Indonesia*  BAPPENAS 2010, *Indonesia**  (*assumes 1/3 of land is tree crops & agriculture) |
|  |  |  |  | **Average 7±3** | Agus et al. 2013, 7±3, *SE Asia* |
| Grassland –  dry soils |  |  | Savannah | 2  4 | World Agroforest. Cent. 2011, *Indonesia*  Rahayu et al 2005, *Indonesia* |
|  |  |  |  | **Average 3±1** | Agus et al. 2013, 3±1, *SE Asia* |
| Bare land |  |  | Bare land | **0** | Value recommend by Agus et al. (2013): C stock is mostly in the form of necromass (i.e. plant litter). |
| Water bodies | Water bodies | Water | Bodies of water, fish pond | **0** | Assumed |

Table SM3: Emission factors for below ground carbon stocks (soil/peat)

| **LAND COVER (LC)** | | | | **SOIL EMISSIONS FROM LAND CONVERSION** | |
| --- | --- | --- | --- | --- | --- |
| ***Collective LC class*** | ***CCI LC class*** | ***CRISP LC class*** | ***MoEF CL class*** | ***Soil organic matter carbon emission factor***  ***(Mg C ha-1 yr-1)*** | ***Ref source, notes*** |
| Primary forest – intact, natural forest with dense canopy | Tree cover, broadleaved, evergreen, closed to open (>15%) | Lowland evergreen forest | Primary dry land forest | 0 | Khasanah et al. 2015, *Indonesia* |
|  |  |
|  | Tree cover, flooded, fresh or brackish water | Peat swamp forest | Primary swamp forest | 0 | IPCC 2013, *the Tropics* |
| Secondary forest – disturbed forest with evidence of logging |  |  | Secondary dry land forest | 0 | Khasanah et al. 2015, *Indonesia* |
|  |  |  | Secondary swamp forest | 7.9 | Hooijer et al. 2014, *Indonesia* |
| Cropland | Cropland, irrigated or post-flooding | Large scale oil palm plantations | Plantations | *Oil palm plantations on mineral soils* | |
|  |  |  |  | 0 | Khasanah et al. 2015, *Indonesia* |
|  |  |  |  | *Oil palm plantations on organic (peat) soils* | |
|  |  |  |  | 11** | IPCC 2013, *the Tropics* |
|  |  |  |  | *Rubber plantations on mineral soils* | |
|  |  |  |  | 0 | Khasanah et al. 2015, *Indonesia* |
|  |  |  |  | *Rubber plantations on organic (peat) soils* | |
|  |  |  |  | 15** | IPCC 2013, *the Tropics* |
|  |  |  |  | *Timber plantations (e.g. Acacia for pulpwood) on mineral soils* | |
|  |  |  | HTI | 0 | Khasanah et al. 2015, *Indonesia* |
|  |  |  |  | *Timber plantations (e.g. Acacia for pulpwood) on organic (peat) soils* | |
|  |  |  |  | 20** | IPCC 2013, *the Tropics* |
|  |  | Lowland mosaic – check | Dry rice land +/- mixed scrub; rice land | *Rice fields on mineral soils* | |
|  |  |  |  | 0 | Khasanah et al. 2015, *Indonesia* |
|  |  |  |  | *Rice fields on organic (peat) soils* | |
|  |  |  |  | 9.4** | IPCC 2013, *the Tropics* |
| Agroforestry (mixed tree crops) | Mosaic cropland | Lowland mosaic |  | *Agroforestry on mineral soils* | |
|  |  |  |  | 0 | Khasanah et al. 2015, *Indonesia* |
|  |  |  |  | *Agroforestry on organic (peat) soils* | |
|  |  |  |  | 15** | IPCC 2013, *the Tropics* |
|  |  |  |  | *Mosaic cropland (smallholder farming) on organic (peat) soils* | |
|  |  |  |  | 14** | IPCC 2013, *the Tropics* |
| Scrub – small trees and woody shrubs | Shrubland evergreen; sparse vegetation (tree, shrub, herbaceous cover) | Lowland open | Scrubland (on mineral soils) | 0 | Khasanah et al. 2015, *Indonesia* |
|  |  |  | Swamp scrubland (peat soils) | 4.5 | Hooijer et al. 2014 |
| Settlements | Urban areas | Urban | Housing | *Urban areas on mineral soils* | |
|  |  |  |  | 0 | Khasanah et al. 2015, *Indonesia* |
|  |  |  |  | *Urban areas on peat soils* | |
|  |  |  |  | 9.6** | Miettinen et al. 2017, *SE Asia* (derived from IPCC 2013) |
| Grassland – dry mineral soils |  |  | Savannah | 0 | Khasanah et al. 2015, *Indonesia* |
| Bare land |  |  | Bare land | *Bare land on mineral soils* | |
|  |  |  |  | 0 | Khasanah et al. 2015, *Indonesia* |
|  |  |  |  | *Bare land on organic (peat) soils* | |
|  |  |  |  | 11, 15, 20** (apply appropriate plantation EF) | IPCC, 2013 |
| Water bodies | Water bodies | Water | Bodies of water | 0 | Assumed |

Table SM4– GoF scores of all AOIs and LULC map combinations for the year 2000, with analysis direction indicated with -> (left Original, right Reference) and <- (right Original, left Reference). Highest GoF score per AOI indicated in bold.

|  | **CRISP <-> CCI** | | **MoF <-> CCI** | | **MoF <-> CRISP** | |
| --- | --- | --- | --- | --- | --- | --- |
| **CRISP -> CCI** | **CRISP <- CCI** | **MoF -> CCI** | **MoF <- CCI** | **MoF -> CRISP** | **MoF <- CRISP** |
| North Sumatra | 0.378 | **0.508** | 0.394 | 0.394 | 0.499 | 0.369 |
| Riau | 0.318 | **0.433** | 0.308 | 0.270 | 0.395 | 0.249 |
| Central Kalimantan | 0.281 | 0.386 | 0.318 | 0.278 | **0.407** | 0.254 |

Table SM5 – GoF scores of all AOIs and LULC map combinations for the year 2015, with analysis direction indicated with -> (left Original, right Reference) and <- (right Original, left Reference). Highest GoF score per AOI indicated in bold.

|  | **CRISP <-> CCI** | | **MoF <-> CCI** | | **MoF <-> CRISP** | |
| --- | --- | --- | --- | --- | --- | --- |
| **CRISP -> CCI** | **CRISP <- CCI** | **MoF -> CCI** | **MoF <- CCI** | **MoF -> CRISP** | **MoF <- CRISP** |
| North Sumatra | 0.475 | 0.557 | 0.467 | 0.401 | **0.575** | 0.419 |
| Riau | 0.399 | **0.465** | 0.356 | 0.267 | 0.448 | 0.285 |
| Central Kalimantan | 0.295 | 0.494 | 0.328 | 0.287 | **0.525** | 0.272 |

Table SM6 – Overview of LULC Change estimated from CCI, CRISP and MoF for the three AOIs between 2000 and 2015

|  | CCI | | | MoF | | | CRISP | | |
| --- | --- | --- | --- | --- | --- | --- | --- | --- | --- |
| ha | % peat | ha | | % peat | ha | | % peat |
| **North Sumatra** | | | | | | | | | |
| 2000-2003 | 25,901 | 20.9 | 8,050 | | 4.3 | 508,381 | | 7.8 |
| 2003-2006 | 37,661 | 28.5 | 34,724 | | 29.9 |
| 2006-2009 | 55,106 | 19.8 | 638,860 | | 6.4 |
| 2009-2011 | 31,964 | 18.1 | 61,406 | | 9.0 |  | |  |
| 2011-2012 | 30,565 | 11.2 | 53,095 | | 6.1 |  | |  |
| 2012-2013 | 26,239 | 5.4 | 22,930 | | 18.7 |  | |  |
| 2013-2015 | 54,826 | 5.7 | 130,253 | | 10.2 |  | |  |
| *average 2000-2009/2010* | *39,556* | *23.1* | *227,211* | | *13.5* | *508,381* | | *7.8* |
| *average 2000-2015* | *37,466* | *15.7* | *135,617* | | *12.1* |  | |  |
|  | | | | | | | | | |
| **Riau** | | | | | | | | | |
| 2000-2003 | 97,048 | 45.0 | 150,228 | | 58.4 | 803,360 | | 46.8 |
| 2003-2006 | 157,049 | 51.7 | 353,083 | | 60.2 |
| 2006-2009 | 141,662 | 49.1 | 376,841 | | 58.6 |
| 2009-2011 | 117,938 | 56.8 | 262,590 | | 72.7 |  | |  |
| 2011-2012 | 90,888 | 57.5 | 326,130 | | 71.8 |  | |  |
| 2012-2013 | 52,621 | 55.0 | 1,118,233 | | 31.7 |  | |  |
| 2013-2015 | 63,003 | 63.4 | 508,996 | | 49.8 |  | |  |
| *average 2000-2009/2010* | *131,920* | *48.6* | *293,384* | | *59.1* | *803,360* | | *46.8* |
| *average 2000-2015* | *102,887* | *54.1* | *442,300* | | *57.6* |  | |  |
|  | | | | | | | | | |
| **Central Kalimantan** | | | | | | | | | |
| 2000-2003 | 83,163 | 38.9 | 103,631 | | 33.7 | 911,095 | | 21.5 |
| 2003-2006 | 74,028 | 24.4 | 388,471 | | 19.3 |
| 2006-2009 | 149,672 | 27.2 | 222,781 | | 29.8 |
| 2009-2011 | 78,931 | 27.8 | 139,834 | | 13.4 |  | |  |
| 2011-2012 | 50,239 | 30.0 | 59,815 | | 2.4 |  | |  |
| 2012-2013 | 36,892 | 30.6 | 109,720 | | 23.9 |  | |  |
| 2013-2015 | 65,128 | 25.0 | 1,237,019 | | 23.0 |  | |  |
| *average 2000-2009/2010* | *102,288* | *30.1* | *238,294* | | *27.6* | *911,095* | | *21.5* |
| *average 2000-2015* | *76,865* | *29.1* | *323,039* | | *20.8* |  | |  |

Table SM7 – GHG emissions for CRISP and MoF data, based on carbon stock at maturity for palm oil. Percentages are proportions of baseline emissions estimates, see Tables 4 and 5

| **Emissions per year (Mg C yr-1)** | | | | | | |
| --- | --- | --- | --- | --- | --- | --- |
| **North Sumatra** | | | | | | |
|  | CRISP (2000-2010) | | MoF (2000-2011) | | MoF (2011-2015) | |
| Mineral | 3,544,872 | *72%* | 871,984 | *77%* | 4,036,280 | *117%* |
| Peat | 3,320,671 | *96%* | 1,651,461 | *91%* | 857,838 | *101%* |
| *Total* | *5,656,438* | *67%* | *2,523,446* | *86%* | *4,894,117* | *114%* |
|  | | | | | | |
| **Riau** | | | | | | |
|  | CRISP (2000-2010) | | MoF (2000-2011) | | MoF (2011-2015) | |
| Mineral | 9,892,785 | 84% | 4,676,420 | 97% | 4,671,123 | *75%* |
| Peat | 28,058,789 | 96% | 22,905,655 | 99% | 15,443,351 | *93%* |
| *Total* | 37,951,574 | 92% | *27,582,075* | 99% | 20,114,473 | *88%* |
|  | | | | | | |
| **Central Kalimantan** | | | | | | |
|  | CRISP (2000-2010) | | MoF (2000-2011) | | MoF (2011-2015) | |
| Mineral | 13,094,148 | *89%* | 7,229,204 | *87%* | 8,277,973 | *80%* |
| Peat | 10,984,926 | *94%* | 4,997,529 | *97%* | 10,472,336 | *96%* |
| *Total* | 24,079,074 | *91%* | 12,226,733 | *91%* | 18,750,309 | *88%* |

# Supplementary references

Agus, F., Henson, I.E., Sahardjo, B.H., Harris, N., van Noordwijk, M. & Killeen, T.J. (2013) Review of emission factors for assessment of CO2 emission from land use change to oil palm in Southeast Asia. In: *Reports from the Technical Panels of the Second Greenhouse Gas Working Group of the Roundtable for Sustainable Palm Oil (RSPO)* (eds Killeen TJ, Goon J), pp. 7–27. RSPO, Kuala Lumpur. <http://www.rspo.org/file/GHGWG2/3_review_of_emission_factors_Agus_et_al.pdf>

BAPPENAS, 2010. *The national medium term development plan 2010 – 2014*. The National Development Planning Agency (BAPPENAS), Government of Indonesia, Jakarta.

Brown, S. & Masera, O. (2003) Supplementary methods and good practice guidance arising from the Kyoto Protocol, section 4.3 LULUCF projects Good Practice Guidance For Land Use, Land-Use Change and Forestry, Intergovernmental Panel on Climate Change National Greenhouse Gas Inventories Programme. J., Penman, M., Gytartsky, T., Hiraishi, T., Krug, D., Kruger, R., Pipatti, L., Buendia, K., Miwa, T., Ngara, K., Tanabe and Wagner, F. (eds). Kanagawa: Institute for Global Environmental Strategies (IGES), pp 4.89–4.120

Carlson, K.M., Curran, L.M., Ratnasari, D., Pittman, A.D., SoaresFilho, B.S., Asner, G.P., Trigg, S.N., Gaveau, D.A., Lawrence, D., Rodrigues, H.O. (2012) Committed carbon emissions, deforestation, and community land conversion from oil palm plantation expansion in West Kalimantan, Indonesia. *Proceedings of the National Academy of Sciences USA*, 109:7559-7564.

Carlson KM, Curran LM, Asner GP, Pittman AM, Trigg SN, et al. (2013) Carbon emissions from forest conversion by Kalimantan oil palm plantations. *Nature Climate Change* 3: 283–287.

Corley, R.H.V. & Tinker P.B. (2003) *The oil palm*. 4th edition. Blackwell Science Ltd., Oxford.

DeFries, R.S., Houghton, R.A., Hansen, M.C., Field, C.B., Skole, D. & Townshend, J. (2002) Carbon emissions from tropical deforestation and regrowth based on satellite observations for the 1980s and 1990s. *Proceedings National Academy of Sciences* *USA*, 99: 14256–6.

Dewi S, Khasanah N, Rahayu S, Ekadinata A & van Noordwijk M. (2009) *Carbon Footprint of Indonesian Palm Oil Production: a Pilot Study*. Bogor, Indonesia: World Agroforestry. Centre - ICRAF, SEA Regional Office

Donato, D.C., Kauffman, J.B., Murdiyarso, D., Kurnianto, S., Stidham, M., et al. (2011) Mangroves among the most carbon-rich forests in the tropics. *Nature Geoscience* 4: 293–297.

Evans, C.D, Page, S.E. Jones, T., Moore, S., Gauci, V., Laiho, R., Hruska, J., Allott, E., Billett, M., Freeman, C. and Garnett, M. (2014) Contrasting susceptibility of tropical and high-latitude peats to fluvial loss of stored carbon following drainage. *Global Biogeochemical Cycles,* 28, 1215–1234. DOI: 10.1002/2013GB004782

Germer, J., & Sauerborn, J. (2008) Estimation of the impact of oil palm plantation establishment on greenhouse gas balance. *Environmental Development & Sustainability*, 10: 697-716.

Gibbs, H.K. & Brown, S. (2007) Geographical distribution of biomass carbon in tropical southeast Asian forests: an updated database for 2000. Available at http://cdiac.ornl.gov/epubs/ndp/ndp068/ ndp068b.html from the Carbon Dioxide Information Center, Oak Ridge National Laboratory, Oak Ridge, TN

Griscom B., Ganz D., Virgilio N. Price, F., Hayward, J., Cortez, R. & Stanley, B. (2009) *The Hidden Frontier of Forest Degradation: A Review of the Science, Policy and Practice of Reducing Degradation Emissions*. The Nature Conservancy, Arlington, Virginia. 76

Hairiah, K. & Sitompul, S. M. (2000) Assessment and simulation of aboveground and belowground C stocks and dynamics, Bogor, Indonesia, Science and Policy Workshop on Terrestrial Carbon and Possible Trading under the CDM, IC-SEA, BIOTROP, 27 February - 1 March, 2000.

Hairiah, K. & Rahayu S. (2007) Pengukuran ‘karbon tersimpan’ di berbagai macam penggunaan lahan. Bogor. World Agroforestry Centre - ICRAF, Southeast Asia Regional Office, Bogor, 77 p.

Hairiah, K., Sitompul, S.M. van Noordwijk, M & Palm, C. (2001) Carbon stocks of tropical land use systems as part of the global C balance: effects of forest conversion and options for ‘clean development’ activities. ASB Lecture Note 4A, ICRAF Southeast Asia, Bogor, Indonesia.

Halenda, C.J. (1989) *The Ecology of a Fallow Forest After Shifting Cultivation in Niah Forest Reserve*. Report. Forest Department, Sarawak, Malaysia. Forest Ecology.

Harja, D., Dewi, S., Heryawan, F.X. & van Noordwijk, M. (2011) *Forest carbon stock estimates based on National Forest Inventory data*. ALLREDDI Brief 02. World Agroforestry Centre (ICRAF) South East Asia Program, Bogor.

Hashimotio, T., Kojima, K., Tange, T., Sasaki, S. (2000) Changes in carbon storage in fallow forests in the tropical lowlands of Borneo. *Forest Ecology & Management* 126: 331–337.

Henson, I.E. & Dolmat, M.T. (2003) Physiological analysis of an oil palm density trial on a peat soil. *Journal of Oil Palm Research*, 15: 1-27.

Henson I. E. (2005). An assessment of changes in biomass carbon stocks in tree crops and forests in Malaysia. *Journal of Tropical Forest Science*, 17: 279-296

Hergoualc’h, K. & Verchot, L. V. (2011) Stocks and fluxes of carbon associated with land use change in Southeast Asian tropical peatlands: A review. *Global Biogeochemical Cycles*, 25, GB2001, doi:10.1029/2009GB003718.

Hooijer, A., Page, S., Canadell, J. G., Silvius, M., Kwadijk, J., Wösten, H. & Jauhiainen,J. (2010) Current and future CO2 emissions from drained peat soils in Southeast Asia. *Biogeosciences*, 7, 1505–1514.

Hooijer, A., Page, S.E., Jauhiainen, J., Lee, W.A., Idris, A. & Anshari, G. (2012) Subsidence and carbon loss in drained tropical peatlands. *Biogeosciences*, 9: 1053-1071.

Hooijer, A., Page, S.E. et al. (2014) *Carbon emissions from drained and degraded tropical peatlands and resulting CO2 emission factors for MRV.* Scientific report; Indonesia-Australia Forest Carbon Partnership.

Hoshizaki, H., Niiyama, K., Kimura, K., Yamashita, T., Bekku, Y., Okuda, T., Quah, E.S. & Nur Supardi, M.N. (2004) Temporal and spatial variation of forest biomass in relation to stand dynamics in a mature, lowland tropical rainforest, Malaysia. *Ecological Research* 19: 357–363.

Houghton, R.A. (1999) The annual net flux of carbon to the atmosphere from changes in land use 1850–1990. *Tellus* B 51: 298–13

Houghton, R.A. & Hackler, J.L. (1999) Emissions of carbon from forestry and land-use change in tropical Asia. *Global Change Biology*, 5: 481–492.

IPCC (2006) *IPCC Guidelines for National Greenhouse Gas Inventories*. Prepared by the National Greenhouse Gas Inventories Programme, H.S. Eggleston et al. (eds). Japan: Institute For Global Environmental Strategies.

Istomo, H., Rahaju, S., Permana, E., Suryawan, S.I, Hidayat & Waluyo A. 2006. *Monitoring dan evaluasi delineasi potensi areal proyek karbon dan pendugaan cadangan karbon di wilayah kajian taman nasional Berbak dan buffer-zone, Propinsi Jambi dan areal eks-PLG, Propinsi Kalimantan Tengah*. Laporan kerjasama penelitian Fakultas Kehutanan IPB dan Wetland International, Bogor, Indonesia.

Jauhiainen, J. & Silvennoinen, H. (2012) Diffusion GHG fluxes at tropical peatland drainage canal water surfaces. *Suo*, 63: 93-105.

Jepsen, M. R. (2006) Above-ground carbon stocks in tropical fallows, Sarawak, Malaysia. *Forest Ecology & Management*, 225: 287–295.

Khasanah, N., van Noordwijk, M., Ningsih, H. & Rahayu, S. (2015) Carbon neutral? No change in mineral soil carbon stock under oil palm plantations derived from forest or non-forest in Indonesia. *Agriculture, Ecosystems and Environment*, 211: 195–206.

Kronseder, K., Ballhorn, U., Bohm, V. & Siegert, F. (2012) Above ground biomass estimation across forest types at different degradation levels in Central Kalimantan using LiDAR data. *International Journal of Applied Earth Observation & Geoinformatics*, 18: 37–48.

Koh, L.P., Miettinen, J., Liew, S.C., & Ghazoul, J. (2011) Remotely sensed evidence of tropical peatland conversion to oil palm. *Proceedings of the National Academy of Sciences*, USA, 108: 5127–5132.

Komiyama, A., Ong, J.E. & Poungparn, S. (2008) Allometry, biomass, and productivity of mangrove forests: A review. *Aquatic Botany*, 89: 128–137.

Lasco, R.D. & Pulhin, F.B. (2004) Carbon budgets of tropical forest ecosystems in Southeast Asia: implications for climate change. In: *Forests for poverty reduction: opportunities with clean development mechanism, environmental services and biodiversity*. Food and Agriculture Organization – FAO, Bangkok, pp. 61-76.

Laumonier Y., Edin, A., Kanninen, M., & Munandar, A.W. (2010) Landscape-scale variation in the structure and biomass of the hill dipterocarp forest of Sumatra: Implications for carbon stock assessments. *Forest Ecology & Management*, 259: 505–513.

Matsumura, N., Nakama, E., Sukandi, T. & Imanuddin, R. (2008) Carbon stock estimates for *Acacia mangium* forests in Malaysia and Indonesia - Potential for implementation of afforestation and reforestation CDM projects. *Forest Resources & Mathematical Modeling - FORMATH*, 7: 15–24.

Miettinen, J., Shi, C. & Liew, S.C. (2016) Land cover distribution in the peatlands of Peninsular Malaysia, Sumatra and Borneo in 2015 with changes since 1990. *Global Ecology & Conservation*, 6: 67-78.

Miettinen, J., Hooijer, A., Vernimmen, R., Liew, S.C. & Page, S.E. (2017) From carbon sink to carbon source: extensive peat oxidation in insular Southeast Asia since 1990. *Environmental Research Letters,* 12 024014 (<http://iopscience.iop.org/1748-9326/12/2/024014>)

Ministry of Forestry (MoF) (2008) Rekalkulasi penutupan hutan Indonesia (Recalculation of Indonesian land cover). Badan Planologi Kehutanan, Departemen Kehutanan, Jakarta.

Moore, S., Evans, C.D., Page, S.E., Garnett, M.H., Jones, T.G., Freeman, C., Limin, S.H. & Gauci, V. (2013) Fluvial organic carbon fluxes reveal deep instability of deforested tropical peatlands. *Nature*, 493: 660-663.

Morel, A.C., Saatchi, S.S., Malhi, Y., Berry, N.J., Banin, L., Burslem, D., Nilus, R., & Ong, R.C. (2011) Estimating aboveground biomass in forest and oil palm plantation in Sabah, Malaysian Borneo using ALOS PALSAR data. *Forest Ecology & Management*, 262: 1786–1798.

Murdiyarso, D., Donato, D., Kauffman, J.B., Stidham, M. & Kanninen, M. (2009) *Carbon storage in mangrove and peatland ecosystems: A preliminary account from plots in Indonesia*. Working paper 48. Center for International Forest Research, Bogor Barat, Indonesia. 37p.

Murdiyarso, D., Hergoualc’h, K. & Verchot, L.V. (2010) Opportunities for reducing greenhouse gas emissions in tropical peat soils. *Proceedings of the National Academy of Sciences*, 107, 19655-19660.

Murdiyarso, D. & Wasrin, U. R. (1995) Estimating land use change and carbon release from tropical forests conversion using remote sensing technique. *Journal of Biogeography*, 22: 715721.

Noordwijk, M., Hairiah, K. & Sitompul, S. M. (2000) Reducing uncertainties in the assessment at national scale of C stock impacts of land use change. In *Proc. IGES/NIES Workshop on GHG Inventories for Asia-Pacific Region* (ed. Macandog, D. B.), Hayama, Japan: Institute for Global Environmental Strategies (IGES), 2000, 150163.

Nurwahyudi & Tarigan, M. 2001. Logging residue management and productivity in short rotation Acacia mangium plantations in Riau Province, Sumatra, Indonesia. In: *Site Management and Productivity in Tropical Plantation Forests*. Proceedings of Workshops in Congo, July 2001 and China Feb. 2003. CIFOR.

Omar, H. (2010) Forest biomass & carbon stocks mapping using satellite imageries & issues relating to REDD+ in Malaysia. In: *Workshop on Methods for Biomass Estimation and Forest-Cover Mapping*, Woods Hole Research Center, 8-12 October 2010, Center for Climate Change Studies, University of Mulawarman, Indonesia.

Omar, W., Aziz, N.A., Mohammed, A.T., Harun, M.H. & Din, A.K. (2010) Mapping of oil palm cultivation on peatland in Malaysia. MPOB Information Series, June 2010.

Ong, J.E., Gong, W.K., & Wong, C.H. (1982) Studies on nutrient levels in standing biomass, litter and slash in a mangrove forest. BIOTRor.

Palm, C.A., Woomer, P.L. , Alegre, J., Arevalo, J.L., Castilla, C., Cordeiro, D.G., Feigl, B., Hairiah, K., Kotto-Same, J. ., Mendes, A. , Moukam, A., Murdiyarso, D., Njomgang, R., Parton, W.J., Ricse, A., Rodrigues, V., Sitompul, S.M. & van Noordwijk, M. (1999) *Carbon sequestration and trace gas emissions in slash and burn and alternative land uses in the humid tropics*, Nairobi, Kenya, ASB Climate Change Working Group Final Report, Phase II, ASB. Coordination Office, ICRAF

Pinard, M.A. & Putz F.E. (1996) Retaining forest biomass by reducing logging damage. *Biotropica* 28: 278- 295.

Prasetyo, L. B., Murdiyarso, D. & Rosalina, U. (2000) Analysis of land-use changes and greenhouse gas emission (GHG) using geographical information system (GIS) technologies. In: *Workshop on Improving Land-use/cover Change and Greenhouse Gas Emission Biophysical Data.* Institute Pertanian Bogor, Bogor, Indonesia.

Proctor, J., Anderson, Chai, P. & Vallack, H.W. (1983) Ecological studies in four contrasting lowland rain forests in Gunung Mulu National Park, Sarawak I. Forest environment, structure and floristics. *Journal of Ecology*, 71: 237-260.

Putz, F. & Chan, H.T. (1986) Tree growth, dynamics, and productivity in a mature mangrove forest in Malaysia. *Forest Ecology & Management*, 17: 211– 230.

Rahayu, S., Lusiana, B. & van Noordwijk, M. 2005. Above ground carbon stock assessment for various land use systems in Nunukan, East Kalimantan. p. 21−34. In B. Lusiana, M. van Noordwijk, & S. Rahayu (eds.) *Carbon Stock Monitoring in Nunukan, East Kalimantan: A spatial and modeling approach*. World Agroforestry Centre, Southeast Asia Office, Bogor

Rogi, J.E.X. (2002) Penyusunan Model Simulasi Dinamika Nitrogen Pertanaman Kelapa Sawit (*Elaeis* *guineensis*, Jacq.) di Unit Usaha Bekri Provinsi Lampung (Nitrogen dynamics model for oil palm plantation in Lampung). Disertation. Institut Pertanian Bogor, Bogor, Indonesia.

Sakata, R., Shimada, S., Arai, H., Yoshioka, N., Yoshioka, R., Aoki, H., Kimoto, N., Sakamoto, A., Melling, L. & Inubushi, K. (2015) Effect of soil types and nitrogen fertilizer on nitrous oxide and carbon dioxide emissions in oil palm plantations. *Soil Science & Plant Nutrition*, 61: 48-60.

Slik, J.W.F., Aiba, S.-I., Brearley, F.Q. *et al.* (2010) Environmental correlates of tree biomass, basal area, wood specific gravity and stem density gradients in Borneo's tropical forests. *Global Ecology & Biogeography* 19: 50-60.

Sitompol, S.M. & Hairiah, K. (2000). Biomass measurement of home garden. In: *Proceedings of Workshop on LUCC and Greenhouse Gas Emissions, Biophysical Data*, IPB, Bogor.

Syahrinudin (2005). The potential of palm oil and forest plantations for carbon sequestration on degraded land in Indonesia. In: Vlek, P.L.G. et al. (eds). Ecol. Dev. Series No. 27. Cuvillier Verlag, Göttingen.

Toma, T., Ishida, A. & Matius, P. (2005) Long-term monitoring of post- fire aboveground biomass recovery in a lowland dipterocarp forest in East Kalimantan, Indonesia. *Nutrient Cycling in Agroecosystems*, 71: 63–72.

Toriyama, J., Takahashi, T., Nishimura, S., Sato, T., Monda, Y., Saito, H., Awaya, Y., Limin, S.H., Susanto, A.R., Darma, F., Krisyoyo & Kiyono, Y. (2014) Estimation of fuel mass and its loss during a forest fire in peat swamp forests of Central Kalimantan, Indonesia. *Forest Ecology & Management* 314: 1-8.

van Noordwijk, M., Dewi, S., Khasanah, N., Ekadinata, A., Rahayu, S., Caliman, J.P., Sharma, M., & Suharto, R. (2010) Estimating the carbon footprint of biofuel production from oil palm: Methodology and results from two sites in Indonesia. International Conference of Oil Palm and Environment, 23-25 Feb. 2010, Denpasar, Bali, Indonesia

Waldes, N. J. L. &  Page, S.E. (2001), Forest structure and tree diversity of a peat swamp forest in central Kalimantan, Indonesia. In: *Peatlands for People: Natural Resource Functions and Sustainable Management. Proceedings of the International Symposium on Tropical Peatland, 22–23 August 2001*, J. O. Rieley & S. E. Page (eds), pp. 16–22, BPPT and Indonesian Peat Assoc., Jakarta.

World Agroforestry Centre (2011) *Accountability and Local Level Initiative to Reduce Emission from Deforestation and Degradation in Indonesia (ALLREDDI)*, *Final Report 2011*. World Agroforestry Centre-ICRAF South East Asia Regional Office, Bogor, Indonesia.

Yamakura, T., Hagihara, A., Sukardjo, S., Ogawa, H. (1986) Aboveground biomass of tropical rain forest stands in Indonesian Borneo. *Vegetatio* 68: 71–82.

Ziegler, A. D., Phelps, J., Yuen, J. Q., Webb, E. L., Lawrence, D., Fox, J. M., Bruun, T.B., Leisz, S.J., Ryan, C.R., Dressler, W., Mertz, O., Pascual, U, Padoch, C. & Koh, L. P. (2012). Carbon outcomes of major land‐cover transitions in SE Asia: great uncertainties and REDD+ policy implications. *Global Change Biology*, 18: 3087-3099.
